# Supplementary material for: Identification of a 16‐MTGs Prognostic Signature in Diffuse Large B‐Cell Lymphoma
Source: Hindawi journal article supplement (doi:10.1155/2024/4619644), 2024-01-01
Supplement: f1 [file 4619644.f1.docx]

Supplementary table 1 Detailed information of clinicopathological characteristics of each series.

| GEO ID | gender radio (male/female) | Type  (ABC/GCB/Unclassified) | treatment (CHOP-Like Regimen/  R-CHOP-Like Regimen/other) | stage (st1/st2/  st3/st4) |
| --- | --- | --- | --- | --- |
| GSE11318 | 112/91 | 74/71/58 | 163/40/0 | 25/50/32/55 |
| GSE32918 | 144/105 | 80/120/49 | \ | \ |
| GSE53786 | 68/48 | 46/46/22 | 44/70/5 | 17/35/31/33 |
| GSE10846 | 224/172 | 167/183/64 | 181/233/0 | 66/122/97/121 |

Supplementary table 2 Detailed information of enrichment analysis.

| ID | Description | pvalue | p.adjust | qvalue | Count |
| --- | --- | --- | --- | --- | --- |
| GO:0016765 | transferase activity, transferring alkyl or aryl (other than methyl) groups | 7.77E-06 | 0.00377 | 0.003118 | 6 |
| GO:0016628 | oxidoreductase activity, acting on the CH-CH group of donors, NAD or NADP as acceptor | 5.62E-05 | 0.008017 | 0.006629 | 4 |
| GO:0004364 | glutathione transferase activity | 6.55E-05 | 0.008017 | 0.006629 | 4 |
| GO:0043295 | glutathione binding | 8.47E-05 | 0.008017 | 0.006629 | 3 |
| GO:0072341 | modified amino acid binding | 9.06E-05 | 0.008017 | 0.006629 | 6 |
| GO:1900750 | oligopeptide binding | 0.000112 | 0.008017 | 0.006629 | 3 |
| GO:0050662 | coenzyme binding | 0.000145 | 0.008017 | 0.006629 | 10 |
| GO:0016829 | lyase activity | 0.000155 | 0.008017 | 0.006629 | 8 |
| GO:0051536 | iron-sulfur cluster binding | 0.000165 | 0.008017 | 0.006629 | 5 |
| GO:0051540 | metal cluster binding | 0.000165 | 0.008017 | 0.006629 | 5 |
| GO:0009055 | electron transfer activity | 0.000352 | 0.015516 | 0.01283 | 6 |
| GO:0050660 | flavin adenine dinucleotide binding | 0.000477 | 0.017562 | 0.014522 | 5 |
| GO:0004879 | nuclear receptor activity | 0.000587 | 0.017562 | 0.014522 | 4 |
| GO:0098531 | transcription factor activity, direct ligand regulated sequence-specific DNA binding | 0.000587 | 0.017562 | 0.014522 | 4 |
| GO:1990841 | promoter-specific chromatin binding | 0.000636 | 0.017562 | 0.014522 | 4 |
| GO:0050750 | low-density lipoprotein particle receptor binding | 0.000643 | 0.017562 | 0.014522 | 3 |
| GO:0051184 | cofactor transmembrane transporter activity | 0.000643 | 0.017562 | 0.014522 | 3 |
| GO:0002020 | protease binding | 0.000652 | 0.017562 | 0.014522 | 6 |
| GO:0033218 | amide binding | 0.000714 | 0.018229 | 0.015074 | 10 |
| GO:0031406 | carboxylic acid binding | 0.001071 | 0.025977 | 0.021481 | 7 |
| GO:0070325 | lipoprotein particle receptor binding | 0.00122 | 0.027446 | 0.022695 | 3 |
| GO:0016874 | ligase activity | 0.001247 | 0.027446 | 0.022695 | 6 |
| GO:0016627 | oxidoreductase activity, acting on the CH-CH group of donors | 0.001302 | 0.027446 | 0.022695 | 4 |
| GO:0090482 | vitamin transmembrane transporter activity | 0.001364 | 0.02757 | 0.022798 | 3 |
| GO:0043177 | organic acid binding | 0.001517 | 0.029424 | 0.024331 | 7 |
| GO:0016757 | transferase activity, transferring glycosyl groups | 0.002189 | 0.040588 | 0.033562 | 8 |
| GO:0005201 | extracellular matrix structural constituent | 0.00226 | 0.040588 | 0.033562 | 6 |
| GO:0046974 | histone methyltransferase activity (H3-K9 specific) | 0.002874 | 0.048671 | 0.040247 | 2 |
| GO:0016620 | oxidoreductase activity, acting on the aldehyde or oxo group of donors, NAD or NADP as acceptor | 0.00291 | 0.048671 | 0.040247 | 3 |
| hsa01240 | Biosynthesis of cofactors | 8.74E-09 | 1.98E-06 | 1.73E-06 | 15 |
| hsa00983 | Drug metabolism - other enzymes | 0.000179 | 0.020237 | 0.01772 | 7 |
| hsa00280 | Valine, leucine and isoleucine degradation | 0.0007 | 0.032017 | 0.028035 | 5 |
| hsa00270 | Cysteine and methionine metabolism | 0.000846 | 0.032017 | 0.028035 | 5 |
| hsa00510 | N-Glycan biosynthesis | 0.000846 | 0.032017 | 0.028035 | 5 |
| hsa01230 | Biosynthesis of amino acids | 0.00085 | 0.032017 | 0.028035 | 6 |
| hsa00480 | Glutathione metabolism | 0.001538 | 0.049651 | 0.043476 | 5 |

Supplementary table 3 potential drugs for DLBCL patients.

| Drug name | Drug target | Feature Name |
| --- | --- | --- |
| Navitoclax | BCL2, BCL-XL, BCL-W | ARID1A_mut |
| Navitoclax | BCL2, BCL-XL, BCL-W | CREBBP_mut |
| Navitoclax | BCL2, BCL-XL, BCL-W | EP300_mut |
| Navitoclax | BCL2, BCL-XL, BCL-W | MLL2_mut |
| Navitoclax | BCL2, BCL-XL, BCL-W | PTEN_mut |
| Navitoclax | BCL2, BCL-XL, BCL-W | TP53_mut |
| Navitoclax | BCL2, BCL-XL, BCL-W | cnaDLBC2 |
| Navitoclax | BCL2, BCL-XL, BCL-W | cnaDLBC4 |
| KU-55933 | ATM | ARID1A_mut |
| KU-55933 | ATM | CREBBP_mut |
| KU-55933 | ATM | EP300_mut |
| KU-55933 | ATM | MLL2_mut |
| KU-55933 | ATM | PTEN_mut |
| KU-55933 | ATM | TP53_mut |
| KU-55933 | ATM | cnaDLBC2 |
| KU-55933 | ATM | cnaDLBC4 |
| PD173074 | FGFR1, FGFR2, FGFR3 | ARID1A_mut |
| PD173074 | FGFR1, FGFR2, FGFR3 | CREBBP_mut |
| PD173074 | FGFR1, FGFR2, FGFR3 | EP300_mut |
| PD173074 | FGFR1, FGFR2, FGFR3 | MLL2_mut |
| PD173074 | FGFR1, FGFR2, FGFR3 | PTEN_mut |
| PD173074 | FGFR1, FGFR2, FGFR3 | TP53_mut |
| PD173074 | FGFR1, FGFR2, FGFR3 | cnaDLBC4 |
| PD173074 | FGFR1, FGFR2, FGFR3 | ARID1A_mut |
| BMS-536924 | IGF1R, IR | CREBBP_mut |
| BMS-536924 | IGF1R, IR | EP300_mut |
| BMS-536924 | IGF1R, IR | MLL2_mut |
| BMS-536924 | IGF1R, IR | PTEN_mut |
| BMS-536924 | IGF1R, IR | TP53_mut |
| BMS-536924 | IGF1R, IR | cnaDLBC2 |
| BMS-536924 | IGF1R, IR | cnaDLBC4 |
| BMS-536924 | IGF1R, IR | ARID1A_mut |
| GSK1904529A | IGF1R, IR | CREBBP_mut |
| GSK1904529A | IGF1R, IR | EP300_mut |
| GSK1904529A | IGF1R, IR | MLL2_mut |
| GSK1904529A | IGF1R, IR | PTEN_mut |
| GSK1904529A | IGF1R, IR | TP53_mut |
| GSK1904529A | IGF1R, IR | cnaDLBC2 |
| GSK1904529A | IGF1R, IR | cnaDLBC4 |
| GSK1904529A | IGF1R, IR | ARID1A_mut |
| Linsitinib | IGF1R | CREBBP_mut |
| Linsitinib | IGF1R | EP300_mut |
| Linsitinib | IGF1R | MLL2_mut |
| Linsitinib | IGF1R | PTEN_mut |
| Linsitinib | IGF1R | TP53_mut |
| Linsitinib | IGF1R | cnaDLBC2 |
| Linsitinib | IGF1R | cnaDLBC4 |
| Linsitinib | IGF1R | ARID1A_mut |
| LCL161 | XIAP, IAP1, IAP2 | CREBBP_mut |
| LCL161 | XIAP, IAP1, IAP2 | EP300_mut |
| LCL161 | XIAP, IAP1, IAP2 | MLL2_mut |
| LCL161 | XIAP, IAP1, IAP2 | PTEN_mut |
| LCL161 | XIAP, IAP1, IAP2 | TP53_mut |
| LCL161 | XIAP, IAP1, IAP2 | cnaDLBC2 |
| LCL161 | XIAP, IAP1, IAP2 | cnaDLBC4 |
| LCL161 | XIAP, IAP1, IAP2 | ARID1A_mut |
| Entinostat | HDAC1, HDAC3 | CREBBP_mut |
| Entinostat | HDAC1, HDAC3 | EP300_mut |
| Entinostat | HDAC1, HDAC3 | MLL2_mut |
| Entinostat | HDAC1, HDAC3 | PTEN_mut |
| Entinostat | HDAC1, HDAC3 | TP53_mut |
| Entinostat | HDAC1, HDAC3 | cnaDLBC2 |
| Entinostat | HDAC1, HDAC3 | cnaDLBC4 |
| Entinostat | HDAC1, HDAC3 | ARID1A_mut |
| AZD5582 | XIAP, cIAP | CREBBP_mut |
| AZD5582 | XIAP, cIAP | EP300_mut |
| AZD5582 | XIAP, cIAP | MLL2_mut |
| AZD5582 | XIAP, cIAP | PTEN_mut |
| AZD5582 | XIAP, cIAP | TP53_mut |
| AZD5582 | XIAP, cIAP | cnaDLBC2 |
| AZD5582 | XIAP, cIAP | cnaDLBC4 |
| AZD5582 | XIAP, cIAP | ARID1A_mut |
| PCI-34051 | HDAC8, HDAC6, HDAC1 | CREBBP_mut |
| PCI-34051 | HDAC8, HDAC6, HDAC1 | EP300_mut |
| PCI-34051 | HDAC8, HDAC6, HDAC1 | MLL2_mut |
| PCI-34051 | HDAC8, HDAC6, HDAC1 | PTEN_mut |
| PCI-34051 | HDAC8, HDAC6, HDAC1 | TP53_mut |
| PCI-34051 | HDAC8, HDAC6, HDAC1 | cnaDLBC2 |
| PCI-34051 | HDAC8, HDAC6, HDAC1 | cnaDLBC4 |
| PCI-34051 | HDAC8, HDAC6, HDAC1 | ARID1A_mut |
| AZD4547 | FGFR1, FGFR2, FGFR3 | CREBBP_mut |
| AZD4547 | FGFR1, FGFR2, FGFR3 | EP300_mut |
| AZD4547 | FGFR1, FGFR2, FGFR3 | MLL2_mut |
| AZD4547 | FGFR1, FGFR2, FGFR3 | PTEN_mut |
| AZD4547 | FGFR1, FGFR2, FGFR3 | TP53_mut |
| AZD4547 | FGFR1, FGFR2, FGFR3 | cnaDLBC2 |
| AZD4547 | FGFR1, FGFR2, FGFR3 | cnaDLBC4 |
| AZD4547 | FGFR1, FGFR2, FGFR3 | ARID1A_mut |
| Sabutoclax | BCL2, BCL-XL, BFL1, MCL1 | CREBBP_mut |
| Sabutoclax | BCL2, BCL-XL, BFL1, MCL1 | EP300_mut |
| Sabutoclax | BCL2, BCL-XL, BFL1, MCL1 | MLL2_mut |
| Sabutoclax | BCL2, BCL-XL, BFL1, MCL1 | PTEN_mut |
| Sabutoclax | BCL2, BCL-XL, BFL1, MCL1 | TP53_mut |
| Sabutoclax | BCL2, BCL-XL, BFL1, MCL1 | cnaDLBC2 |
| Sabutoclax | BCL2, BCL-XL, BFL1, MCL1 | cnaDLBC4 |
| Sabutoclax | BCL2, BCL-XL, BFL1, MCL1 | ARID1A_mut |
| Venetoclax | BCL2 | CREBBP_mut |
| Venetoclax | BCL2 | EP300_mut |
| Venetoclax | BCL2 | MLL2_mut |
| Venetoclax | BCL2 | PTEN_mut |
| Venetoclax | BCL2 | TP53_mut |
| Venetoclax | BCL2 | cnaDLBC2 |
| Venetoclax | BCL2 | cnaDLBC4 |
| Venetoclax | BCL2 | ARID1A_mut |
| ABT737 | BCL2, BCL-XL, BCL-W, BCL-B, BFL1 | CREBBP_mut |
| ABT737 | BCL2, BCL-XL, BCL-W, BCL-B, BFL1 | EP300_mut |
| ABT737 | BCL2, BCL-XL, BCL-W, BCL-B, BFL1 | MLL2_mut |
| ABT737 | BCL2, BCL-XL, BCL-W, BCL-B, BFL1 | PTEN_mut |
| ABT737 | BCL2, BCL-XL, BCL-W, BCL-B, BFL1 | TP53_mut |
| ABT737 | BCL2, BCL-XL, BCL-W, BCL-B, BFL1 | cnaDLBC2 |
| ABT737 | BCL2, BCL-XL, BCL-W, BCL-B, BFL1 | cnaDLBC4 |
| ABT737 | BCL2, BCL-XL, BCL-W, BCL-B, BFL1 | ARID1A_mut |
| NVP-ADW742 | IGF1R | CREBBP_mut |
| NVP-ADW742 | IGF1R | EP300_mut |
| NVP-ADW742 | IGF1R | MLL2_mut |
| NVP-ADW742 | IGF1R | PTEN_mut |
| NVP-ADW742 | IGF1R | TP53_mut |
| NVP-ADW742 | IGF1R | cnaDLBC2 |
| NVP-ADW742 | IGF1R | cnaDLBC4 |
| NVP-ADW742 | IGF1R | ARID1A_mut |
| Foretinib | MET, KDR, TIE2, VEGFR3/FLT4, RON, PDGFR, FGFR1, EGFR | CREBBP_mut |
| Foretinib | MET, KDR, TIE2, VEGFR3/FLT4, RON, PDGFR, FGFR1, EGFR | EP300_mut |
| Foretinib | MET, KDR, TIE2, VEGFR3/FLT4, RON, PDGFR, FGFR1, EGFR | MLL2_mut |
| Foretinib | MET, KDR, TIE2, VEGFR3/FLT4, RON, PDGFR, FGFR1, EGFR | PTEN_mut |
| Foretinib | MET, KDR, TIE2, VEGFR3/FLT4, RON, PDGFR, FGFR1, EGFR | TP53_mut |
| Foretinib | MET, KDR, TIE2, VEGFR3/FLT4, RON, PDGFR, FGFR1, EGFR | cnaDLBC2 |
| Foretinib | MET, KDR, TIE2, VEGFR3/FLT4, RON, PDGFR, FGFR1, EGFR | cnaDLBC4 |
| Foretinib | MET, KDR, TIE2, VEGFR3/FLT4, RON, PDGFR, FGFR1, EGFR | ARID1A_mut |
| BMS-754807 | IGF1R, IR | CREBBP_mut |
| BMS-754807 | IGF1R, IR | EP300_mut |
| BMS-754807 | IGF1R, IR | MLL2_mut |
| BMS-754807 | IGF1R, IR | PTEN_mut |
| BMS-754807 | IGF1R, IR | TP53_mut |
| BMS-754807 | IGF1R, IR | cnaDLBC2 |
| BMS-754807 | IGF1R, IR | cnaDLBC4 |
| BMS-754807 | IGF1R, IR | ARID1A_mut |
