# Supplementary material for: Identification of a 16‐MTGs Prognostic Signature in Diffuse Large B‐Cell Lymphoma
Source: Hindawi journal article supplement (doi:10.1155/2024/4619644), 2024-01-01
Supplement: f2 [file 4619644.f2.zip]

Archive with 6 entries (6 files):
- supplementary figure 1.jpg
- supplementary figure 2.psd
- supplementary figure 3.psd
- supplementary figure 4.psd
- supplementary figure 5.jpg
- supplementary figure 6.jpg
