# Supplementary figures and images for: Identification of a 16‐MTGs Prognostic Signature in Diffuse Large B‐Cell Lymphoma
Source: Hindawi journal article supplement (doi:10.1155/2024/4619644), 2024-01-01

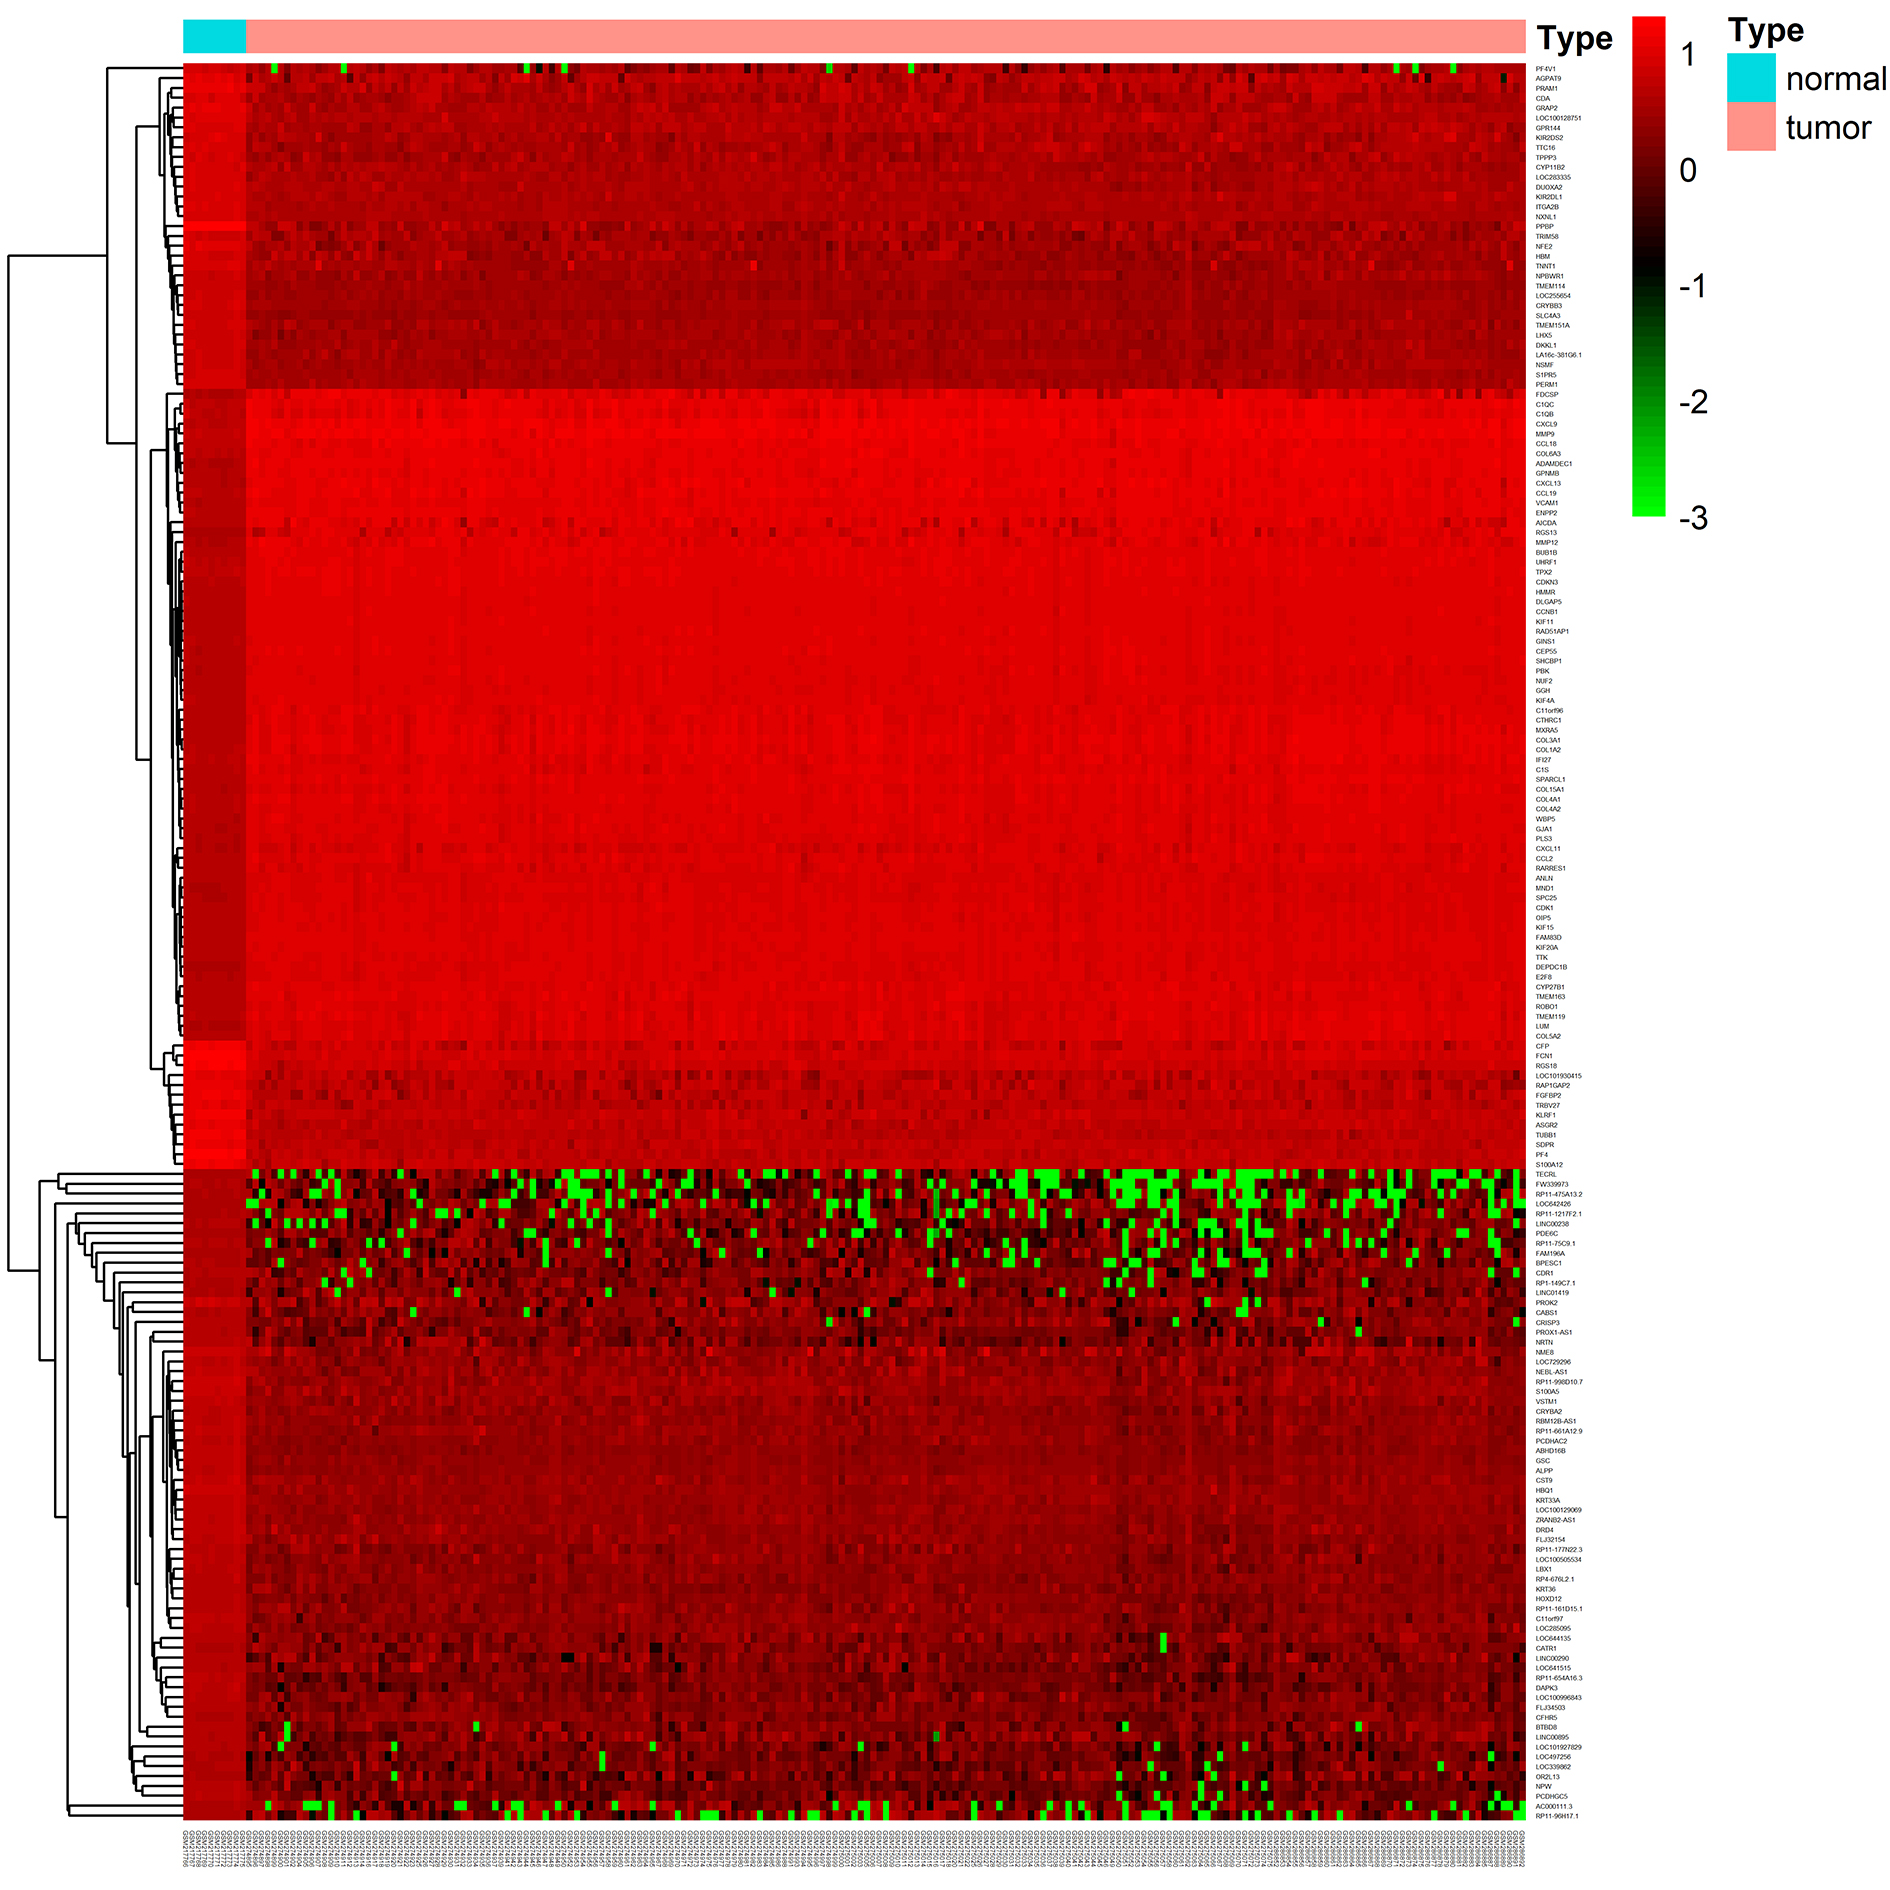

Supplement: f2 [file 4619644.f2.zip › supplementary figure 1.jpg]

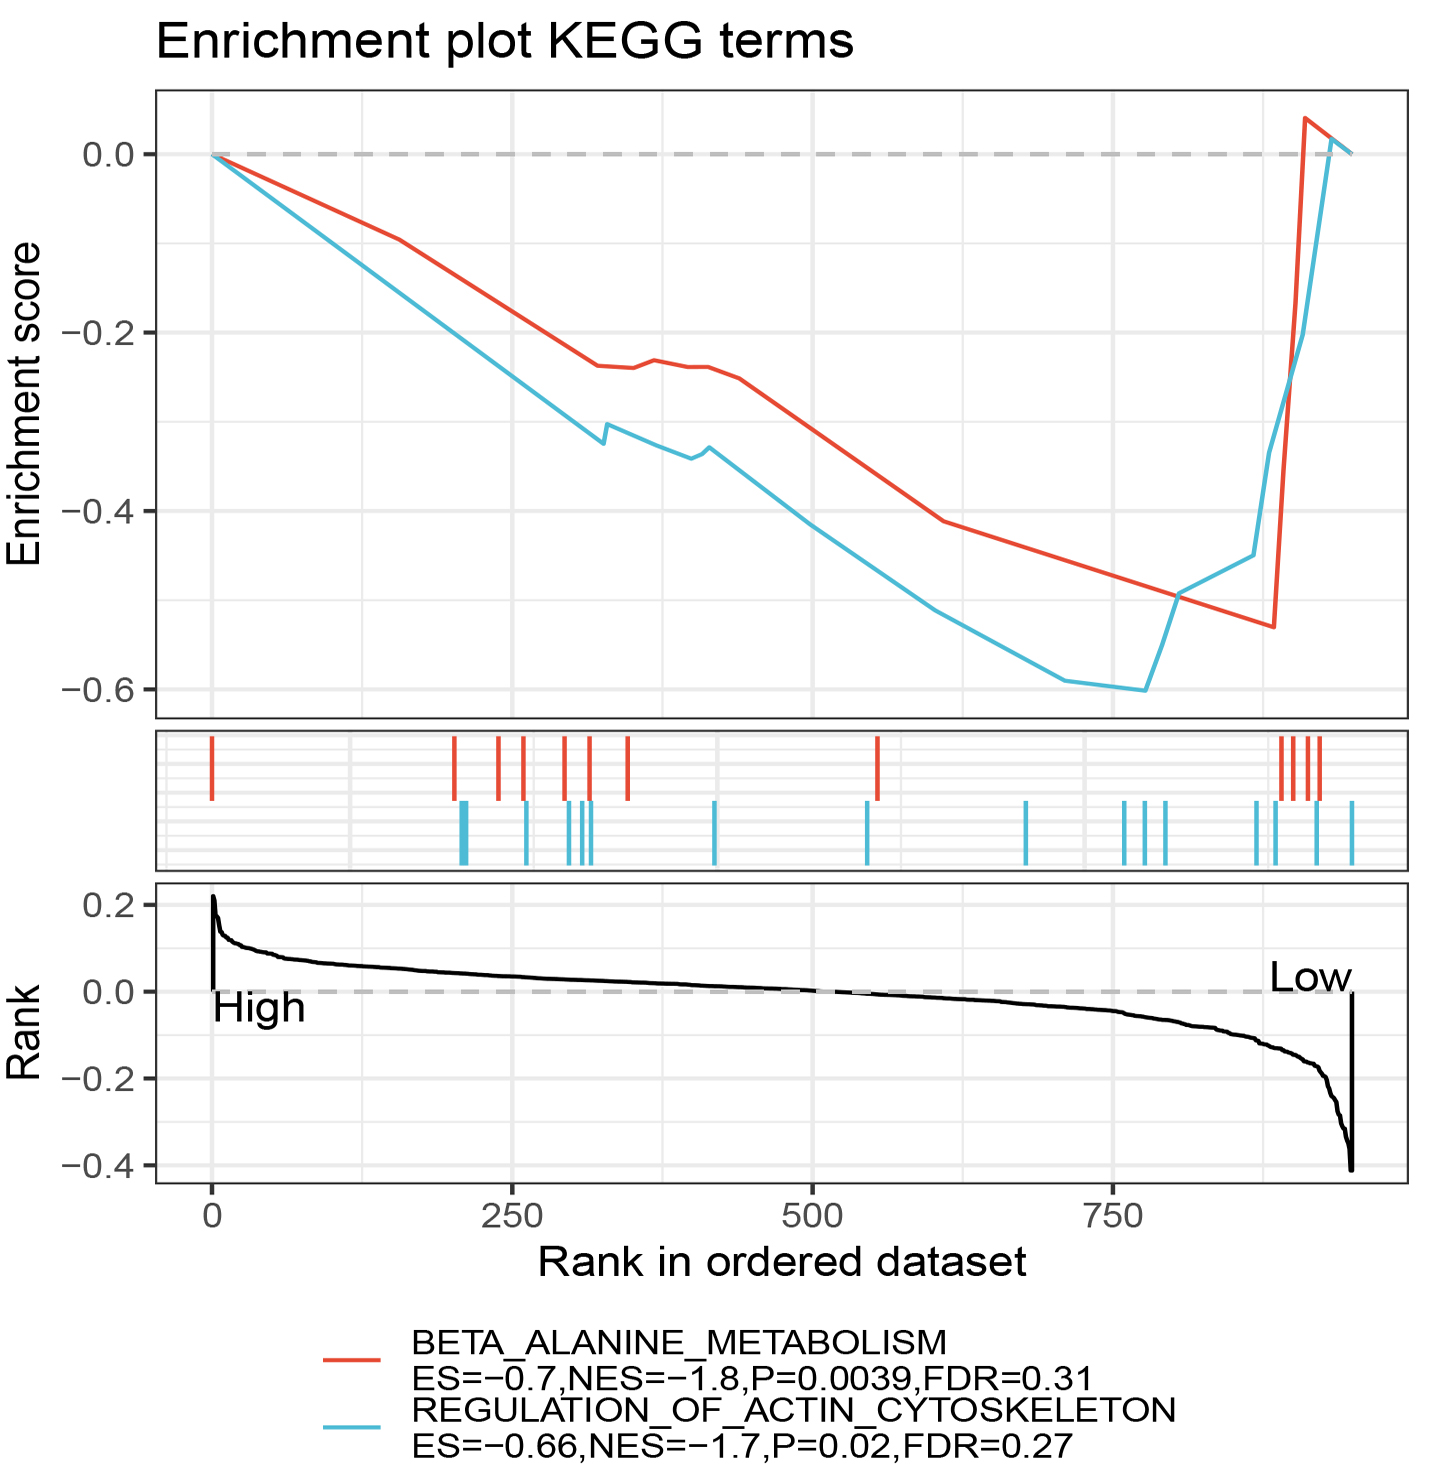

Supplement: f2 [file 4619644.f2.zip › supplementary figure 5.jpg]

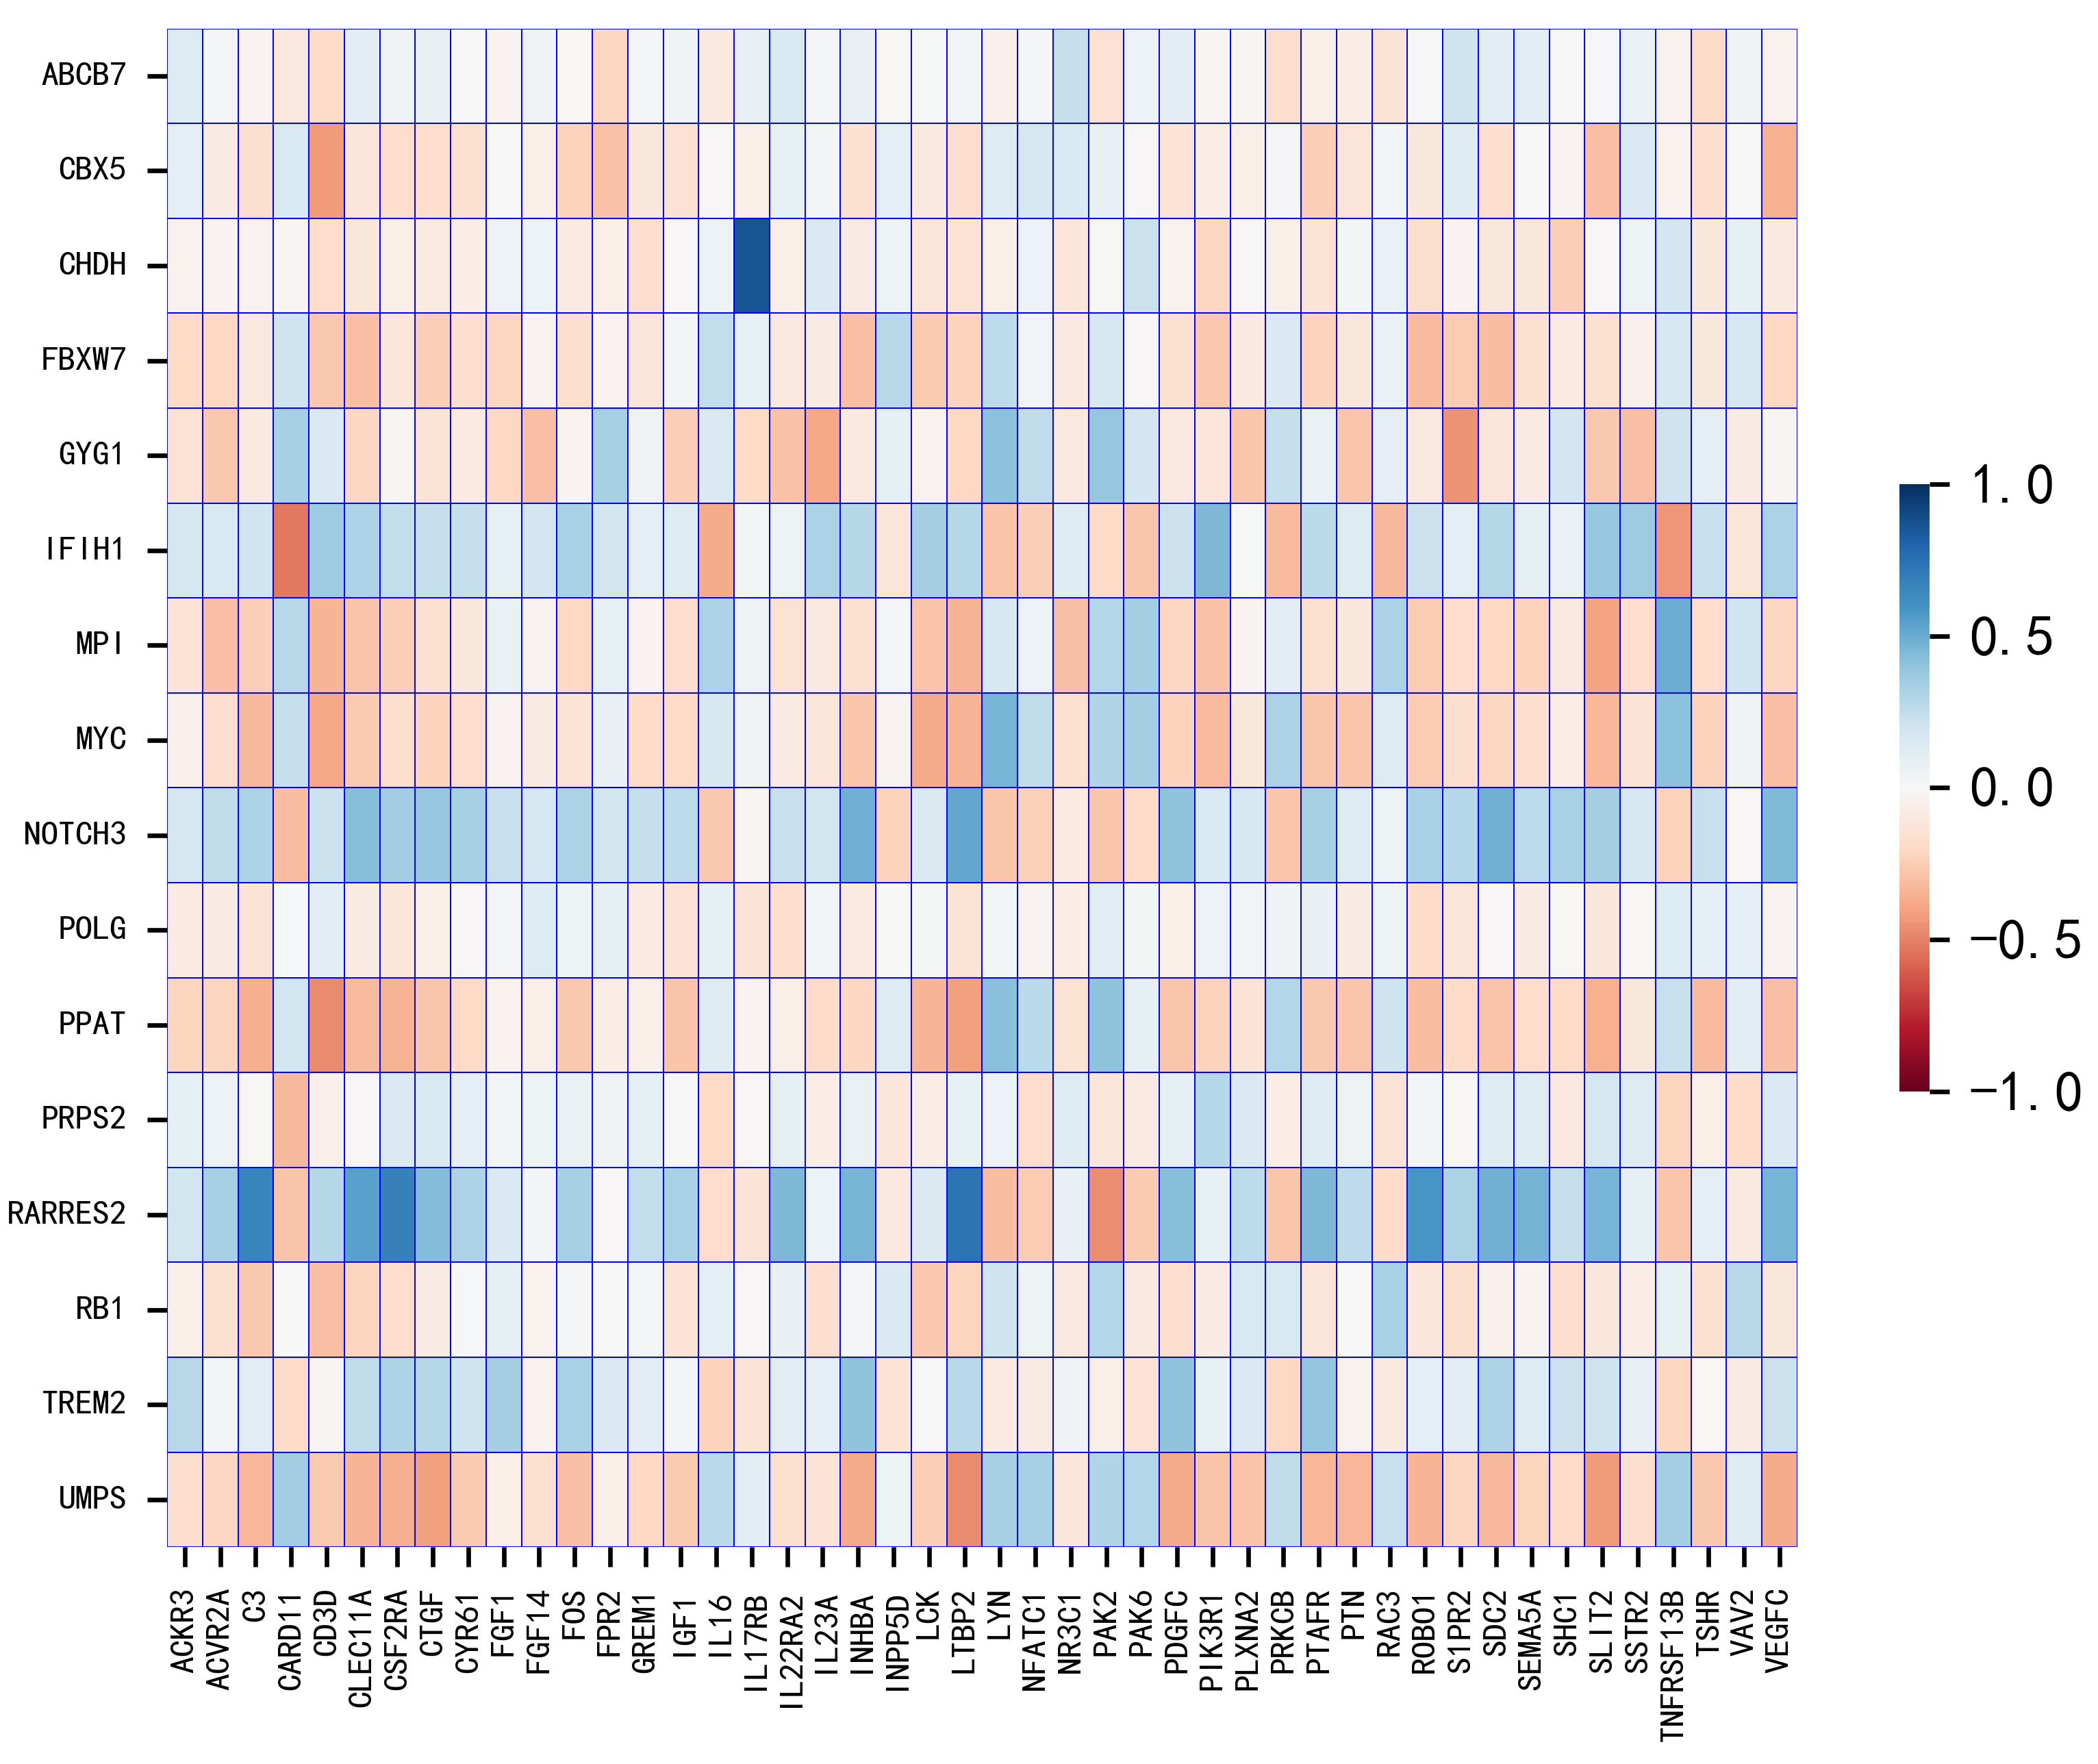

Supplement: f2 [file 4619644.f2.zip › supplementary figure 6.jpg]
